# Supplementary material for: Impact of Aortic Root Abscess on Surgical Outcomes of Infective Endocarditis
Source: MDPI journal article supplement (doi:10.3390/life14010092), 2024-01-07
Supplement: s1 [file s1]

**Supplementary Table S1:** Risk factors for Infective Endocarditis (IE).

| <b>Variables</b>                | <b>All patients<br/>n = 665</b> | <b>Non-Abscess group<br/>n = 525</b> | <b>Abscess group<br/>n = 140</b> | <b>p-value</b> |
|---------------------------------|---------------------------------|--------------------------------------|----------------------------------|----------------|
| History of IE                   | 45/665 (6.7%)                   | 36/524 (6.9%)                        | 9/139 (6.5%)                     | 0.869          |
| Valvular heart disease          | 203/665 (30.5%)                 | 162/524 (30.9%)                      | 41/139 (29.5%)                   | 0.747          |
| Mitral valve prolapse           | 31/665 (4.7%)                   | 26/524 (5.0%)                        | 5/139 (3.6%)                     | 0.498          |
| Previous cardiac surgery        | 185/663 (27.9%)                 | 149/524 (28.4%)                      | 36/139 (25.9%)                   | 0.553          |
| Previous valve replacement      | 154/665 (23.2%)                 | 123/524 (23.5%)                      | 31/139 (22.3%)                   | 0.771          |
| Vascular graft implantation     | 18/665 (2.7%)                   | 15/524 (2.9%)                        | 3/139 (2.2%)                     | 0.650          |
| Congenital heart disease        | 19/665 (2.9%)                   | 15/524 (2.9%)                        | 4/139 (2.9%)                     | 0.992          |
| HIV Infection                   | 57/665 (8.6%)                   | 12/524 (2.3%)                        | 3/139 (2.2%)                     | 0.926          |
| Active Malignancy               | 57/665 (8.6 %)                  | 46/524 (8.8%)                        | 11/139 (7.9%)                    | 0.746          |
| ESRD under dialysis             | 62/312 (19.9%)                  | 53/242 (21.9%)                       | 9/70 (12.9%)                     | 0.234          |
| Current Alcohol abuse           | 52/665 (7.8%)                   | 40/524 (7.6%)                        | 12/139 (8.6%)                    | 0.697          |
| Current intravenous drug abuse  | 44/665 (6.6%)                   | 35/524 (6.7%)                        | 9/139 (6.5%)                     | 0.931          |
| Active Hepatitis                | 44/663 (6.6%)                   | 34/524 (6.5%)                        | 10/139 (7.2%)                    | 0.766          |
| Spondylodiscitis                | 46/665 (6.9%)                   | 39/524 (7.4%)                        | 6/139 (4.3%)                     | 0.193          |
| Previous Pacemaker Implantation | 56/665 (8.6%)                   | 45/516 (8.7%)                        | 11/135 (8.1%)                    | 0.833          |

For listed nominal variables, the absolute number, n, is calculated with percentage (%).

IE: infective endocarditis, HIV: human immunodeficiency virus, ESRD: End stage renal disease.

**Supplementary Table S2:** Manifestations of Infective Endocarditis (IE).

| Variables                        | All patients<br>n = 665 | Non-Abscess group<br>n = 525 | Abscess group<br>n = 140 | <i>p</i> -value |
|----------------------------------|-------------------------|------------------------------|--------------------------|-----------------|
| <b>Clinical manifestations</b>   |                         |                              |                          |                 |
| Fever                            | 376/663 (56.7%)         | 294/524 (56.1%)              | 82/139 (59.0%)           | 0.542           |
| Neurological                     | 183/663 (27.6%)         | 140/524 (26.7%)              | 43/139 (30.9%)           | 0.323           |
| Headache/dizziness               | 11/54 (20.4%)           | 7/41 (17.1%)                 | 4/13 (30.8%)             | 0.608           |
| Disturbance in vision            | 2/54 (3.7%)             | 2/41 (4.9%)                  | 0/13                     |                 |
| Seizures                         | 3/54 (5.6%)             | 2/41 (4.9%)                  | 1/13 (7.7%)              |                 |
| Paresis/Plegia                   | 5/54 (9.3%)             | 5/41 (12.2%)                 | 0/13                     |                 |
| Encephalitis/meningitis          | 11/54 (20.4%)           | 9/41 (22.0%)                 | 2/13 (15.4%)             |                 |
| Delirium                         | 22/54 (40.7%)           | 16/41 (39.0%)                | 6/13 (46.2%)             |                 |
| TIA                              | 14/179 (7.8%)           | 12/136(8.8%)                 | 2/43(4.7%)               | 0.836           |
| Ischemia                         | 98/179 (54.7%)          | 73/136 (53.7%)               | 25/43 (58.1%)            |                 |
| Bleeding                         | 12/179 (6.7%)           | 9/136 (6.6%)                 | 3/43 (7.0%)              |                 |
| Others                           | 55/179 (30.7%)          | 42/136 (30.9%)               | 13/43 (30.2%)            |                 |
| Sepsis                           | 262/663 (39.5%)         | 208/524 (38.8%)              | 54/139 (38.8%)           | 0.856           |
| Preoperative catecholamines      | 86/663 (13.0%)          | 71/524 (13.5%)               | 15/139 (10.8%)           | 0.390           |
| Septic embolism                  | 219/653 (33.5%)         | 170/517 (32.9%)              | 49/136 (36.0%)           | 0.520           |
| Cerebral embolism                | 155/663 (23.4%)         | 122/524 (23.3%)              | 33/139 (23.7%)           | 0.910           |
| Preoperative Intubation          | 99/663 (14.9%)          | 80/524 (15.3%)               | 19/139 (13.7%)           | 0.638           |
| Myocardial infarction            | 16/663 (2.4%)           | 15/524 (2.9%)                | 1/139 (0.7%)             | 0.143           |
| <b>Laboratory manifestations</b> |                         |                              |                          |                 |
| Bacteraemia                      | 447/663 (67.4%)         | 354/524 (67.6%)              | 93/139 (66.9%)           | 0.884           |

|                                         |                 |                 |                 |              |
|-----------------------------------------|-----------------|-----------------|-----------------|--------------|
| Leucocytes preoperatively               | 10.2±6.8        | 10.1±5.2        | 10.7±10.8       | 0.346        |
| Leucocytes 2. POD                       | 12.5±5.7        | 12.5±5.4        | 12.5±6.5        | 0.924        |
| Leucocytes 7. POD                       | 10.9±5.5        | 10.8±5.4        | 11.3±5.9        | 0.406        |
| <b>Echocardiographic manifestations</b> |                 |                 |                 |              |
| Perforation                             | 114/663 (17.2%) | 80/524 (15.3%)  | 34/139 (24.5%)  | <b>0.011</b> |
| Fistula                                 | 15/663 (2.3%)   | 9/524 (1.7%)    | 6/139 (4.3%)    | 0.067        |
| Vegetations                             | 531/650 (81.7%) | 423/514 (82.3%) | 108/136 (79.4%) | 0.439        |

Metric variables are calculated as mean with respective standard deviation ( $\pm$ ). For nominal variables, the absolute number (n) is calculated with percentage (%).

TIA: Transient ischemic attack, POD: Postoperative day.

**Supplementary Table S3: Causes of death in surgically treated IE patients**

| <b>Variables*</b>                    | <b>All patients<br/>(n = 665)</b> |
|--------------------------------------|-----------------------------------|
| Septic shock                         | 37/104 (35.6%)                    |
| Multiorgan failure                   | 17/104 (16.3%)                    |
| Cardiogenic shock                    | 12/104 (11.5%)                    |
| Right-sided heart failure            | 1/104 (1.0%)                      |
| Myocardial infraction                | 2/104 (1.9%)                      |
| Pericardial tamponade                | 8/104 (7.7%)                      |
| Respiratory failure                  | 8/104 (7.7%)                      |
| Mesenterial ischemia                 | 3/104 (2.9%)                      |
| Ischemic stroke                      | 2/104 (1.9%)                      |
| Intracranial haemorrhage             | 3/104 (2.9%)                      |
| Perioperative bleeding complications | 5/104 (4.8%)                      |
| Major bleeding                       | 3/104 (2.9%)                      |
| Malignancy                           | 4/104 (3.8%)                      |
| IE recurrence                        | 5/104 (4.8%)                      |
| ARF                                  | 1/104 (1.0%)                      |
| Others                               | 9/104 (8.7%)                      |

\*For listed nominal variables, the absolute number, n, is calculated with percentage (%).

IE: infective endocarditis, ARF: acute renal failure.
